# Supplementary material for: The IL-21 receptor augments Th2 effector function and alternative macrophage activation
Source: JCI journal article supplement (doi:10.1172/jci27727), 2006-06-16
Supplement: sd1 [file 1]

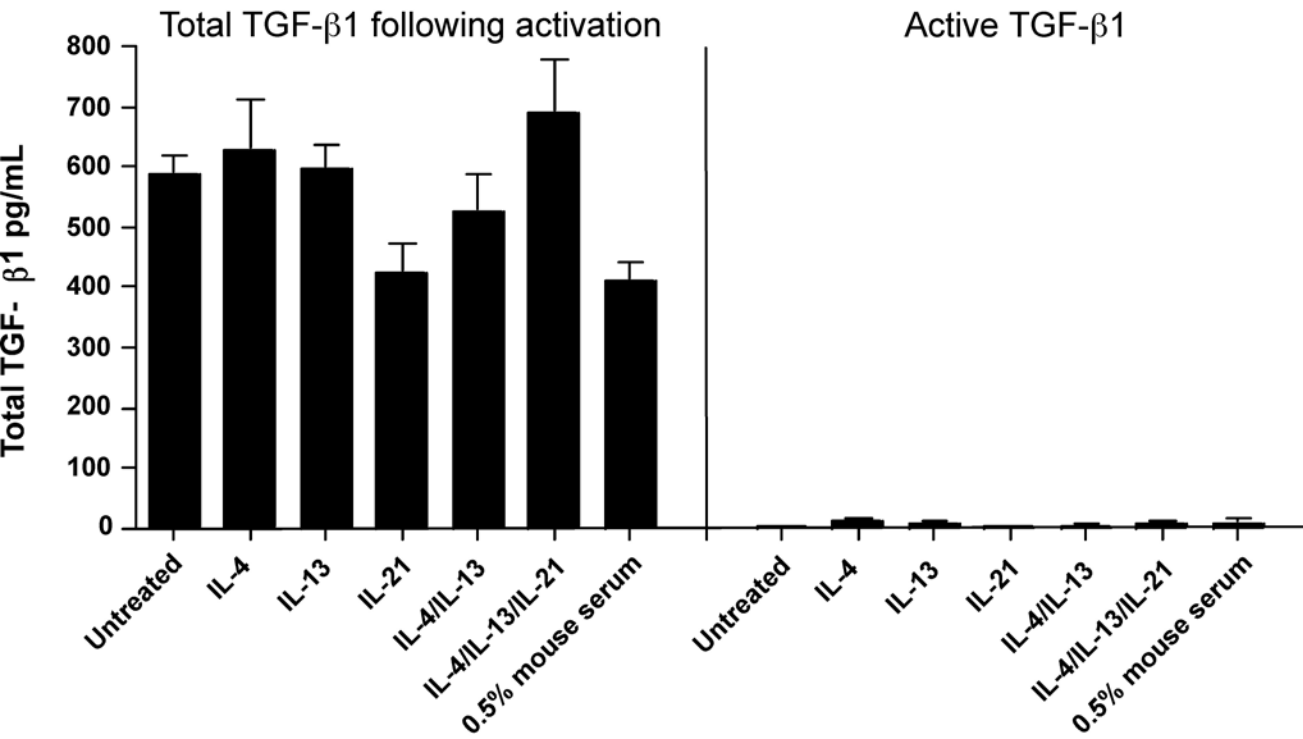

**Supplemental Figure 1. Alternatively activated macrophages do not produce significant quantities of active TGF- $\beta$ 1.** Bone marrow-derived macrophages were prepared as described in the materials and methods section. Macrophages were treated with either IL-21 (20 ng/mL) alone or in combination with IL-4 (20 ng/mL) and IL-13 (20 ng/mL) overnight. IL-21 treatments occurred 6 hours prior to IL-4 and IL-13 administration. 20 hours post activation supernatants were assayed for total and active TGF- $\beta$ 1 by ELISA. High levels of total TGF- $\beta$ 1 were detected in all groups except for cells treated with IL-21 alone. Although total TGF- $\beta$ 1 expression was high, active TGF- $\beta$ 1 was minimal in all groups. The data shown are representative of 3 separate experiments producing similar results.
